# Supplementary material for: Transcriptional Regulation Associated with Subcutaneous Adipogenesis in Porcine ACSL1 Gene
Source: MDPI journal article supplement (doi:10.3390/biom13071057), 2023-06-29
Supplement: s1 [file s1]

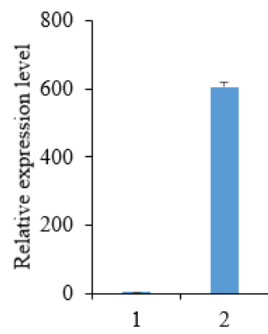

Figure S1. Characterization of the efficiencies of overexpression vector of C/EBP $\alpha$

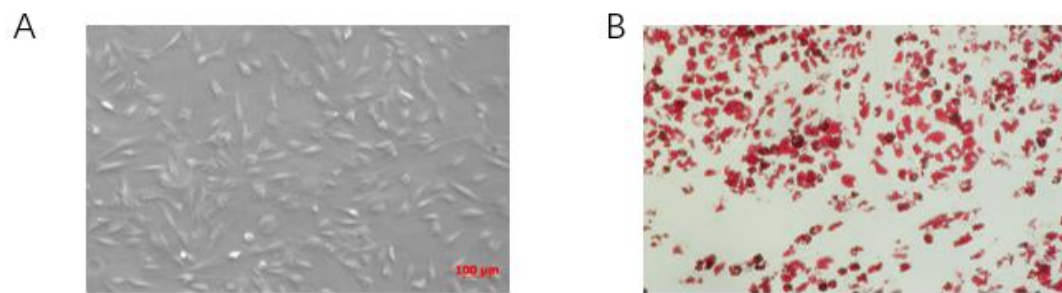

Figure S2. Characterization of preadipocytes cultured with morphological observation under electron microscope (A) and Oil Red O staining (B).

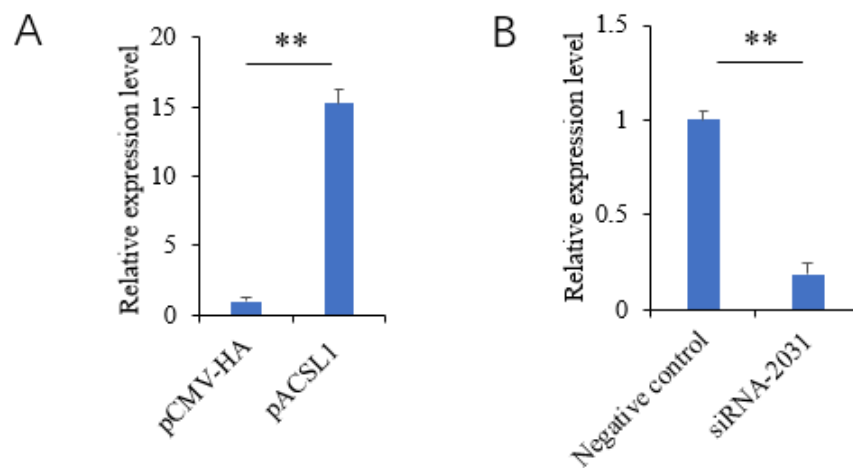

Figure S3. Efficiencies of overexpression vector (A) and siRNA of ACSL1 (B)
