# Supplementary material for: Transcriptional Regulation Associated with Subcutaneous Adipogenesis in Porcine ACSL1 Gene
Source: MDPI journal article supplement (doi:10.3390/biom13071057), 2023-06-29
Supplement: s1 [file s1]

Table S1 Primers used for fragment amplification

| Sequence (5'-3')                                                                        | Purpose                                                                  |
|-----------------------------------------------------------------------------------------|--------------------------------------------------------------------------|
| F: CCG <u>CTCGAGT</u> CACGCAGCGAAAATGATCCG<br>R: CCCA <u>AGCTT</u> AGCACTCACCTCCTCCGCAG | Amplification of – 1649 to + 62 bp of ACSL1                              |
| F: GTAGTGAGCGATTGTTTCAGCGTTTG<br>R: GCGAGAGGCAAGAAAGAGATCAGAG                           | qPCR for ACSL1                                                           |
| F: CATCACCATCGGCAACGA<br>R: GCGTAGAGGTCTTCCTGATGT                                       | qPCR for $\beta$ -actin                                                  |
| F: TAGACAAGAACAGCAACGAG<br>R: ACCTTCTGTTGAGTCTCCACG                                     | qPCR for C/EBP $\alpha$                                                  |
| F: TAGCCCTCAAAACCGCACC<br>R: AGCACTCACCTCCTCCGCAG                                       | Polymorphism analysis                                                    |
| F: CATCAACAAAGGCGAACTC<br>R: CTTTCTCTCCAGGCTTGA                                         | RT-PCR validation of transcript variants identified by PacBio-sequencing |

Enzyme sites were underlined. F, forward; R, reverse; the same as below.

Table S2 siRNA sequence synthesized

| Name       | Sequence                                        |
|------------|-------------------------------------------------|
| siRNA-800  | CAGCGGAAGCUCUGGAUAATT<br>UUAUCCAGAGCUUCCGCUGTT  |
| siRNA-1652 | GGGUGGAGAUCAUGAGCAUTT<br>AUGCUGAUGAUCUCCACCCTT  |
| siRNA-2031 | GGUCAGAGGUAAUAGUCUUTT<br>AAGACUAAUACCUCCUGACCTT |
| siRNA-NC   | UUCUCCGAACGUGUCACGUTT<br>ACGUGACACGUUCGGAGAATT  |

Table S3 Primers used for site-directed mutagenesis

| Name                | Sequence (5'-3')                                                 |
|---------------------|------------------------------------------------------------------|
| F0<br>R0            | The same as that for amplification of – 1649 to + 62 bp of ACSL1 |
| C/EBP $\alpha$ -1MF | CTGCACATCGTAAATAAAATAGGAA                                        |
| C/EBP $\alpha$ -1MR | CTATTTTATTACGATGTGCAGGAC                                         |
| C/EBP $\alpha$ -2MF | CGGATTCGTTAATCCCGGGACA                                           |
| C/EBP $\alpha$ -2MR | TGTCCCGGGATTAACGAATCCG                                           |
| CREB-1MF            | CTGCCATTAGTTGGAACCAAGTGCG                                        |
| CREB-1MR            | ACTGGTTCCAATAATGGCAGTGTT                                         |
| CREB-2MF            | CGCGCGACCAAACGGGAAGGC                                            |
| CREB-2MR            | GCCTTCCCGTTTGGTCGCGCGC                                           |
| – 517G>T-MF         | CAGGTCTGTGTCAAAACCCAC                                            |
| – 517G>T-MR         | GTGGGGTTTTGACACAGACCTG                                           |
| – 311T>G-MF         | GCCCCCGCGGATTCGTTAT                                              |
| – 311T>G-MR         | AACGAATCCGCGGGGGGCA                                              |

Table S4 Schemes for site-directed mutagenesis using overlap-extension PCR

| Sites                  | Reaction A             | Reaction B             | Templates for A and B | Reaction C | Templates for C               |
|------------------------|------------------------|------------------------|-----------------------|------------|-------------------------------|
| C/EBP $\alpha$ -1      | F2/C/EBP $\alpha$ -1MR | C/EBP $\alpha$ -1MF/R0 | pF2/R0                | F2/R0      | Products of reactions A and B |
| C/EBP $\alpha$ -2      | F2/C/EBP $\alpha$ -2MR | C/EBP $\alpha$ -2MF/R0 | pF2/R0                | F2/R0      |                               |
| C/EBP $\alpha$ -double | F2/C/EBP $\alpha$ -2MR | C/EBP $\alpha$ -2MF/R0 | pF2/R0*               | F2/R0      |                               |
| CREB-1                 | F2/CREB-1MR            | CREB-1MF/R0            | pF2/R0                | F2/R0      |                               |
| CREB-2                 | F3/CREB-1MR            | CREB-1MF/R0            | pF3/R0                | F3/R0      |                               |
| - 517G>T               | F2/ - 517G>T-MR        | - 517G>T-MF/R0         | pF2/R0                | F2/R0      |                               |
| - 311T>G               | F2/ - 311T>G -MR       | - 311T>G -MF/R0        | pF2/R0                | F2/R0      |                               |
| SNP-double             | F2/ - 311T>G -MR       | - 311T>G -MF/R0        | pF2/R0**              | F2/R0      |                               |

Plasmids pF2/R0\* containing mutated sites of C/EBP $\alpha$ -1; pF2/R0\*\* containing mutated sites of SNP - 517G>T.

Table S5 Oligonucleotides used for electrophoretic mobility shift assay

|               | Name             | Sequence (5'-3')              |
|---------------|------------------|-------------------------------|
| <b>Site 1</b> | Bio-probe-F      | bio-GACAGATATAGATTTGGACCTAGCC |
|               | Bio-probe-R      | bio-GGCTAGGTCCAAATCTATATCTGTC |
|               | Competitor-F     | GACAGATATAGATTTGGACCTAGCC     |
|               | Competitor-R     | GGCTAGGTCCAAATCTATATCTGTC     |
|               | Competitor-mut-F | GACAGATATAGGCCCTTACCTAGCC     |
|               | Competitor-mut-R | GGCTAGGTTTCCCGCTATATCTGTC     |
| <b>Site 2</b> | Bio-probe-F      | bio-AGGCTTCCATTAGGAAATTCGTTCC |
|               | Bio-probe-R      | bio-GGAACGAATTCCTAATGGAAGCCT  |
|               | Competitor-F     | AGGCTTCCATTAGGAAATTCGTTCC     |
|               | Competitor-R     | GGAACGAATTCCTAATGGAAGCCT      |
|               | Competitor-mut-F | AGGCTTCCATTAGACCCGTCGTTCC     |
|               | Competitor-mut-R | GGAACGAGCCCACTAATGGAAGCCT     |
