# Supplementary material for: Transcriptional Regulation Associated with Subcutaneous Adipogenesis in Porcine ACSL1 Gene
Source: Biomolecules. 2023 Jun 29;13(7):1057. doi: 10.3390/biom13071057 (PMC10377008; doi:10.3390/biom13071057)
Supplement: Supplementary file 1 [file biomolecules-13-01057-s001.zip › Table S6.xlsx]

## Sheet: Sheet1
name	sequence (5'-3')
PB-1	AGGCAGTGGGCTGCGGTGACAGCCGGCGGCGAACCGCCTGGCCTGCGGAGGAGACTGCAGCATAGGGCACCGCCAGCCCAGGATGATGCAAGCCCACGAGCTGTTCCGGTACTTTCGGATGCCAGAGCTGGTTGACTTCCAGCAGTACGTGAGGACCCTCCCAACCAACACGCTCATGGGCTTCGGGGCGTTCGCGGCGCTCACCACCTTCTGGTACGCCACGCGGCCGCGGGCCCTGAAGCCGCCATGCGACCTGGCCATGCAGTCGGTGGAGGTGGCGGGCAGTGATGGCGCCCGGAGATCCGCGATCCTTGACAGTGATGAGCCCTTGGCGTATTTCTATGATGATGTCAGAACGTTATACGAAGGTTTCCAGAGGGGCATACGGGTGTCCAATAA…
PB-2	GGCAGGCAGTGGGCTGCGGTGACAGCCGGCGGCGAACCGCCTGGCCTGCGGAGGAGACTGCAGCATAGGGCACCGCCAGCCCAGGATGATGCAAGCCCACGAGCTGTTCCGGTACTTTCGGATGCCAGAGCTGGTTGACTTCCAGCAGTACGTGAGGACCCTCCCAACCAACACGCTCATGGGCTTCGGGGCGTTCGCGGCGCTCACCACCTTCTGGTACGCCACGCGGCCGCGGGCTACGGACAGACGGAGTGCACAGCCGGGTGCAGCCTGACGGTGCCTGGGGACTGGACTGCAGGCCATGTGGGCGCCCCAATGCCTTGCAGCCTTATAAAGCTGGTGGATGTGGAAGAAATGAATTACTTGGCTGCCAAGGGTGAGGGCGAGGTGTGTGTGAAA…
PB-3	GGCAGGCAGTGGGCTGCGGTGACAGCCGGCGGCGAACCGCCTGGCCTGCGGAGGAGACTGCAGCATAGGGCACCGCCAGCCCAGGATGATGCAAGCCCACGAGCTGTTCCGGTACTTTCGGATGCCAGAGCTGGTTGACTTCCAGCAGTACGTGAGGACCCTCCCAACCAACACGCTCATGGGCTTCGGGGCGTTCGCGGCGCTCACCACCTTCTGGTACGCCACGCGGCCGCGGGCCCTGAAGCCGCCATGCGACCTGGCCATGCAGTCGGTGGAGGTGGCGGGCAGTGATGGCGCCCGGAGATCCGCGATCCTTGACAGTGATGAGCCCTTGGCGTATTTCTATGATGATGTCAGAACGTTATACGAAGGTTTCCAGAGGGGCATACGGGTGTCCAA…
PB-4	AACACGCTCATGGGCTTCGGGGCGTTCGCGGCGCTCACCACCTTCTGGTACGCCACGCGGCCGCGGGCCCTGAAGCCGCCATGCGACCTGGCCATGCAGTCGGTGGAGGTGGCGGGCAGTGATGGCGCCCGGAGATCCGCGATCCTTGACAGTGATGAGCCCTTGGCGTATTTCTATGATGATGTCAGAACGTTATACGAAGGTTTCCAGAGGGGCATACGGGTGTCCAATAATGGCCCATGTTTAGGATCTCGGAAACCAGACCAACCCTATGAATGGCTTTCATACAAACAGGTTGAAGACATGTCGGAGTGTGTGGGTTCAGCGCTGATTCACAAGGGCTTCAAGGCAGGCCCAGAGAATTTCGTCGGCATCTTCGCTCAGAACAGGCCTGAGTGG…
PB-5	AGGCAGTGGGCTGCGGTGACAGCCGGCGGCGAACCGCCTGGCCTGCGGAGGAGACTGCAGCATAGGGCACCGCCAGCCCAGGATGATGCAAGCCCACGAGCTGTTCCGGTACTTTCGGATGCCAGAGCTGGTTGACTTCCAGCAGTACGTGAGGACCCTCCCAACCAACACGCTCATGGGCTTCGGGGCGTTCGCGGCGCTCACCACCTTCTGGTACGCCACGCGGCCGCGGGCCCTGAAGCCGCCATGCGACCTGGCCATGCAGTCGGTGGAGGTGGCGGGCAGTGATGGCGCCCGGAGATCCGCGATCCTTGACAGTGATGAGCCCTTGGCGTATTTCTATGATGATGTCAGAACGTTATACGAAGGTTTCCAGAGGGGCATACGGGTGTCCAATAA…
PB-6	AGGCAGTGGGCTGCGGTGACAGCCGGCGGCGAACCGCCTGGCCTGCGGAGGAGACTGCAGCATAGGGCACCGCCAGCCCAGGATGATGCAAGCCCACGAGCTGTTCCGGTACTTTCGGATGCCAGAGCTGGTTGACTTCCAGCAGTACGTGAGGACCCTCCCAACCAACACGCTCATGGGCTTCGGGGCGTTCGCGGCGCTCACCACCTTCTGGTACGCCACGCGGCCGCGGGCCCTGAAGCCGCCATGCGACCTGGCCATGCAGTCGGTGGAGGTGGCGGGCAGTGATGGCGCCCGGAGATCCGCGATCCTTGACAGTGATGAGCCCTTGGCGTATTTCTATGATGATGTCAGAACGTTATACGAAGGTTTCCAGAGGGGCATACGGGTGTCCAATAA…
PB-7	GGCAGGGCGGGCGCGGCACGCGCACCGGCAGCAGCCTGTCTCCACAGCGGTAGGGGCTGGGGCACAGCCAGCTCACGGCGGCGACGGCGGCGCCCTTAAATAGCATTCGGAGCCAGTGCAGGGCAGGCAGTGGGCTGCGGTGACAGCCGGCGGCGAACCGCCTGGCCTGCGGAGGAGACTGCAGCATAGGGCACCGCCAGCCCAGGATGATGCAAGCCCACGAGCTGTTCCGGTACTTTCGGATGCCAGAGCTGGTTGACTTCCAGCAGTACGTGAGGACCCTCCCAACCAACACGCTCATGGGCTTCGGGGCGTTCGCGGCGCTCACCACCTTCTGGTACGCCACGCGGCCGCGGGCCCTGAAGCCGCCATGCGACCTGGCCATGCAGTCGGTGGAGG…
PB-8	AGGCAGTGGGCTGCGGTGACAGCCGGCGGCGAACCGCCTGGCCTGCGGAGGAGACTGCAGCATAGGGCACCGCCAGCCCAGGATGATGCAAGCCCACGAGCTGTTCCGGTACTTTCGGATGCCAGAGCTGGTTGACTTCCAGCAGTACGTGAGGACCCTCCCAACCAACACGCTCATGGGCTTCGGGGCGTTCGCGGCGCTCACCACCTTCTGGTACGCCACGCGGCCGCGGGCCCTGAAGCCGCCATGCGACCTGGCCATGCAGTCGGTGGAGGTGGCGGGCAGTGATGGCGCCCGGAGATCCGCGATCCTTGACAGTGATGAGCCCTTGGCGTATTTCTATGATGATGTCAGAACGTTATACGAAGGTTTCCAGAGGGGCATACGGGTGTCCAATAA…
PB-9	AGGCAGTGGGCTGCGGTGACAGCCGGCGGCGAACCGCCTGGCCTGCGGAGGAGACTGCAGCATAGGGCACCGCCAGCCCAGGATGATGCAAGCCCACGAGCTGTTCCGGTACTTTCGGATGCCAGAGCTGGTTGACTTCCAGCAGTACGTGAGGACCCTCCCAACCAACACGCTCATGGGCTTCGGGGCGTTCGCGGCGCTCACCACCTTCTGGTACGCCACGCGGCCGCGGGCAGTGATGGCGCCCGGAGATCCGCGATCCTTGACAGTGATGAGCCCTTGGCGTATTTCTATGATGATGTCAGAACGTTATACGAAGGTTTCCAGAGGGGCATACGGGTGTCCAATAATGGCCCATGTTTAGGATCTCGGAAACCAGACCAACCCTATGAATGGCTT…
PB-10	AGGCAGTGGGCTGCGGTGACAGCCGGCGGCGAACCGCCTGGCCTGCGGAGGAGACTGCAGCATAGGGCACCGCCAGCCCAGGATGATGCAAGCCCACGAGCTGTTCCGGTACTTTCGGATGCCAGAGCTGGTTGACTTCCAGCAGTACGTGAGGACCCTCCCAACCAACACGCTCATGGGCTTCGGGGCGTTCGCGGCGCTCACCACCTTCTGGTACGCCACGCGGCCGCGGGCCCTGAAGCCGCCATGCGACCTGGCCATGCAGTCGGTGGAGGTGGCGGGCAGTGATGGCGCCCGGAGATCCGCGATCCTTGACAGTGATGAGCCCTTGGCGTATTTCTATGATGATGTCAGAACGTTATACGAAGGTTTCCAGAGGGGCATACGGGTGTCCAATAA…
PB-11	AGCAGTCAGCTGTTGGTGGCACAGTTGACTGCAGCATAGGGCACCGCCAGCCCAGGATGATGCAAGCCCACGAGCTGTTCCGGTACTTTCGGATGCCAGAGCTGGTTGACTTCCAGCAGTACGTGAGGACCCTCCCAACCAACACGCTCATGGGCTTCGGGGCGTTCGCGGCGCTCACCACCTTCTGGTACGCCACGCGGCCGCGGGCCCTGAAGCCGCCATGCGACCTGGCCATGCAGTCGGTGGAGGTGGCGGGCAGTGATGGCGCCCGGAGATCCGCGATCCTTGACAGTGATGAGCCCTTGGCGTATTTCTATGATGATGTCAGAACGTTATACGAAGGTTTCCAGAGGGGCATACGGGTGTCCAATAATGGCCCATGTTTAGGATCTCGGAAAC…
PB-12	CTCGCGGCTGTGAGGAGCGATGTCAGGAGTTGGTCTGCTGCTGCCGGGCTCGGGTGCCGCTCCTGTGGGCTTGTTTGAGGGATGCGTTCCTGGTGAAGGCCATCCAGCTGCTGTTGTTCAGCTGGATGAAAGCTTGAGGCACTTAAGAAGGAGAGAAGCATGCGGCTCACCCAGTTTTTTGATTTATAAGTGACACGAAGAAAATAAAATGCTAGTACTGCAGCATAGGGCACCGCCAGCCCAGGATGATGCAAGCCCACGAGCTGTTCCGGTACTTTCGGATGCCAGAGCTGGTTGACTTCCAGCAGTACGTGAGGACCCTCCCAACCAACACGCTCATGGGCTTCGGGGCGTTCGCGGCGCTCACCACCTTCTGGTACGCCACGCGGCCGCGGGCCC…
PB-13	AGGCAGTGGGCTGCGGTGACAGCCGGCGGCGAACCGCCTGGCCTGCGGAGGAGACTGCAGCATAGGGCACCGCCAGCCCAGGATGATGCAAGCCCACGAGCTGTTCCGGTACTTTCGGATGCCAGAGCTGGTTGACTTCCAGCAGTACGTGAGGACCCTCCCAACCAACACGCTCATGGGCTTCGGGGCGTTCGCGGCGCTCACCACCTTCTGGTACGCCACGCGGCCGCGGGCCCTGAAGCCGCCATGCGACCTGGCCATGCAGTCGGTGGAGGTGGCGGGCAGTGATGGCGCCCGGAGATCCGCGATCCTTGACAGTGATGAGCCCTTGGCGTATTTCTATGATGATGTCAGAACGTTATACGAAGGTTTCCAGAGGGGCATACGGGTGTCCAATAA…
PB-14	AGGCAGTGGGCTGCGGTGACAGCCGGCGGCGAACCGCCTGGCCTGCGGAGGAGACTGCAGCATAGGGCACCGCCAGCCCAGGATGATGCAAGCCCACGAGCTGTTCCGGTACTTTCGGATGCCAGAGCTGGTTGACTTCCAGCAGTACGTGAGGACCCTCCCAACCAACACGCTCATGGGCTTCGGGGCGTTCGCGGCGCTCACCACCTTCTGGTACGCCACGCGGCCGCGGGCCCTGAAGCCGCCATGCGACCTGGCCATGCAGTCGGTGGAGGTGGCGGGCAGTGATGGCGCCCGGAGATCCGCGATCCTTGACAGTGATGAGCCCTTGGCGTATTTCTATGATGATGTCAGAACGTTATACGAAGGTTTCCAGAGGGGCATACGGGTGTCCAATAA…
PB-15	AGGCAGTGGGCTGCGGTGACAGCCGGCGGCGAACCGCCTGGCCTGCGGAGGAGACTGCAGCATAGGGCACCGCCAGCCCAGGATGATGCAAGCCCACGAGCTGTTCCGGTACTTTCGGATGCCAGAGCTGGTTGACTTCCAGCAGTACGTGAGGACCCTCCCAACCAACACGCTCATGGGCTTCGGGGCGTTCGCGGCGCTCACCACCTTCTGGTACGCCACGCGGCCGCGGGCCCTGAAGCCGCCATGCGACCTGGCCATGCAGTCGGTGGAGGTGGCGGGCAGTGATGGCGCCCGGAGATCCGCGATCCTTGACAGTGATGAGCCCTTGGCGTATTTCTATGATGATGTCAGAACGTTATACGAAGGTTTCCAGAGGGGCATACGGGTGTCCAATAA…
PB-16	AGGCAGTGGGCTGCGGTGACAGCCGGCGGCGAACCGCCTGGCCTGCGGAGGAGACTGCAGCATAGGGCACCGCCAGCCCAGGATGATGCAAGCCCACGAGCTGTTCCGGTACTTTCGGATGCCAGAGCTGGTTGACTTCCAGCAGTACGTGAGGACCCTCCCAACCAACACGCTCATGGGCTTCGGGGCGTTCGCGGCGCTCACCACCTTCTGGTACGCCACGCGGCCGCGGGCCCTGAAGCCGCCATGCGACCTGGCCATGCAGTCGGTGGAGGTGGCGGGCAGTGATGGCGCCCGGAGATCCGCGATCCTTGACAGTGATGAGCCCTTGGCGTATTTCTATGATGATGTCAGAACGTTATACGAAGGTTTCCAGAGGGGCATACGGGTGTCCAATAA…
PB-17	GCAGTGGGCTGCGGTGACAGCCGGCGGCGAACCGCCTGGCCTGCGGAGGAGACTGCAGCATAGGGCACCGCCAGCCCAGGATGATGCAAGCCCACGAGCTGTTCCGGTACTTTCGGATGCCAGAGCTGGTTGACTTCCAGCAGTACGTGAGGACCCTCCCAACCAACACGCTCATGGGCTTCGGGGCGTTCGCGGCGCTCACCACCTTCTGGTACGCCACGCGGCCGCGGGCCCTGAAGCCGCCATGCGACCTGGCCATGCAGTCGGTGGAGGTGGCGGGCAGTGATGGCGCCCGGAGATCCGCGATCCTTGACAGTGATGAGCCCTTGGCGTATTTCTATGATGATGTCAGAACGTTATACGAAGGTTTCCAGAGGGGCATACGGGTGTCCAATAATG…
PB-18	CTGGCCAGTGCCAGACAAAGAGGGCACTTTCAGGCCTCTGTCAAGGGGCTATTGTACAGGGAGGAGGTGGAGCGCCAGCTTGGCTCGCGGCTGTGAGGAGCGATGTCAGGAGTTGGTCTGCTGCTGCCGGGCTCGGGTGCCGCTCCTGTGGGCTTGTTTGAGGGATGCGTTCCTGGTGAAGGCCATCCAGCTGCTGTTGTTCAGCTGGATGAAAGCTTGAGGCACTTAAGAAGGAGAGAAGCATGCGGCTCACCCAGTTTTTTGATTTATAAGTGACACGAAGAAAATAAAATGCTAGTACTGCAGCATAGGGCACCGCCAGCCCAGGATGATGCAAGCCCACGAGCTGTTCCGGTACTTTCGGATGCCAGAGCTGGTTGACTTCCAGCAGTACGTGAG…
PB-19	AGGCAGTGGGCTGCGGTGACAGCCGGCGGCGAACCGCCTGGCCTGCGGAGGAGACTGCAGCATAGGGCACCGCCAGCCCAGGATGATGCAAGCCCACGAGCTGTTCCGGTACTTTCGGATGCCAGAGCTGGTTGACTTCCAGCAGTACGTGAGGACCCTCCCAACCAACACGCTCATGGGCTTCGGGGCGTTCGCGGCGCTCACCACCTTCTGGTACGCCACGCGGCCGCGGGCCCTGAAGCCGCCATGCGACCTGGCCATGCAGTCGGTGGAGGTGGCGGGCAGTGATGGCGCCCGGAGATCCGCGATCCTTGACAGTGATGAGCCCTTGGCGTATTTCTATGATGATGTCAGAACGTTATACGAAGGTTTCCAGAGGGGCATACGGGTGTCCAATAA…
PB-20	AGGCAGTGGGCTGCGGTGACAGCCGGCGGCGAACCGCCTGGCCTGCGGAGGAGACTGCAGCATAGGGCACCGCCAGCCCAGGATGATGCAAGCCCACGAGCTGTTCCGGTACTTTCGGATGCCAGAGCTGGTTGACTTCCAGCAGTACGTGAGGACCCTCCCAACCAACACGCTCATGGGCTTCGGGGCGTTCGCGGCGCTCACCACCTTCTGGTACGCCACGCGGCCGCGGGCCCTGAAGCCGCCATGCGACCTGGCCATGCAGTCGGTGGAGGTGGCGGGCAGTGATGGCGCCCGGAGATCCGCGATCCTTGACAGTGATGAGCCCTTGGCGTATTTCTATGATGATGTCAGAACGTTATACGAAGGTTTCCAGAGGGGCATACGGGTGTCCAATAA…
